# Supplementary material for: Mechanical Response Changes in Porcine Tricuspid Valve Anterior Leaflet Under Osmotic-Induced Swelling
Source: MDPI journal article supplement (doi:10.3390/bioengineering6030070), 2019-08-15
Supplement: s1 [file s1]

# Mechanical Response Changes in Porcine Tricuspid Valve Anterior Leaflet Under Osmotic-Induced Swelling

Samuel D. Salinas, Margaret M. Clark and Rouzbeh Amini \*

<sup>1</sup> Department of Biomedical Engineering, The University of Akron, Akron, OH USA

\* Correspondence: ramini@uakron.edu; Tel.: (330)-972-5232

## Supplementary materials

Figure S1: Protocol 2 for DI water group

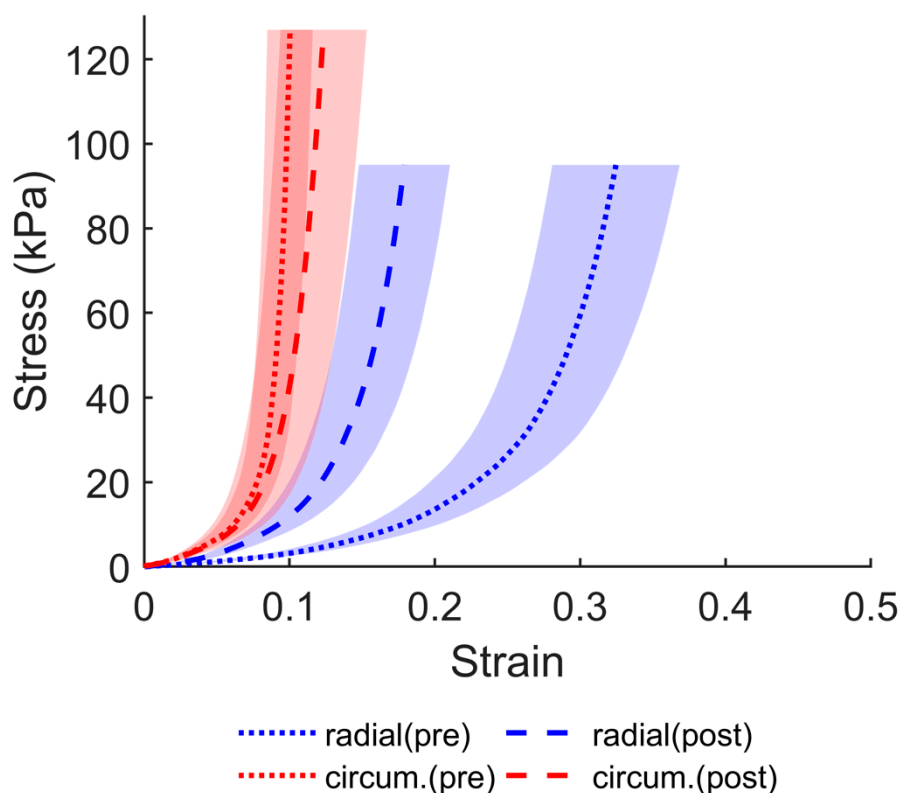

**Figure S1.** Average response of the anterior leaflet in the experiments with the maximum stress value of 95.25 kPa and 127 kPa in the radial and circumferential (circum.) directions, respectively (i.e., Protocol 2 in Table 1) for the DI water group. Shaded regions represent standard error.

Figure S2: Protocol 3 for DI water group

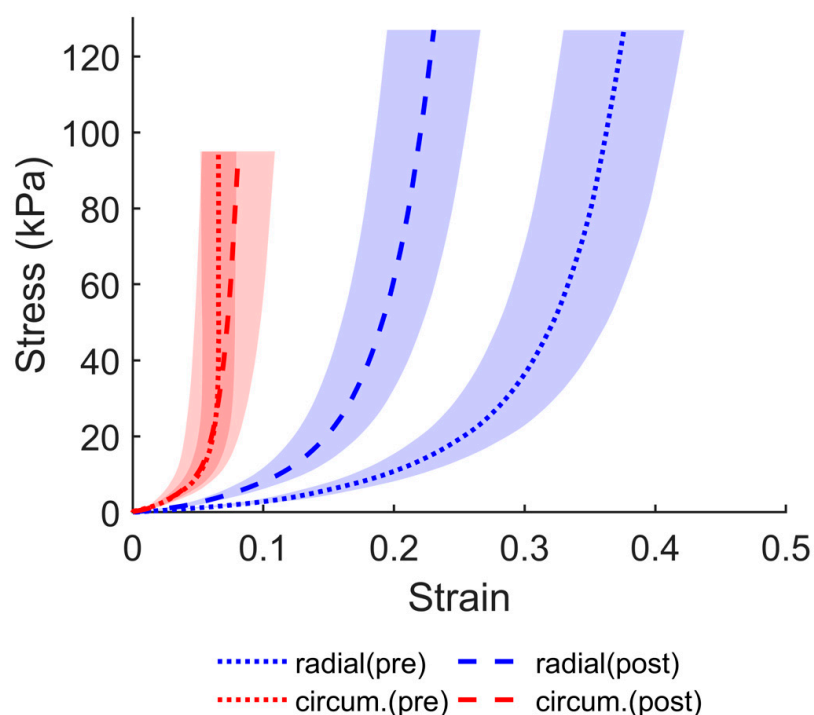

**Figure S2.** Average response of the anterior leaflet in the experiments with the maximum stress value of 127 kPa and 95.25 kPa in the radial and circumferential (circum.) directions, respectively (i.e., Protocol 3 in Table 1) for the DI water group. Shaded regions represent standard error.

Figure S3: Protocol 4 for DI water group

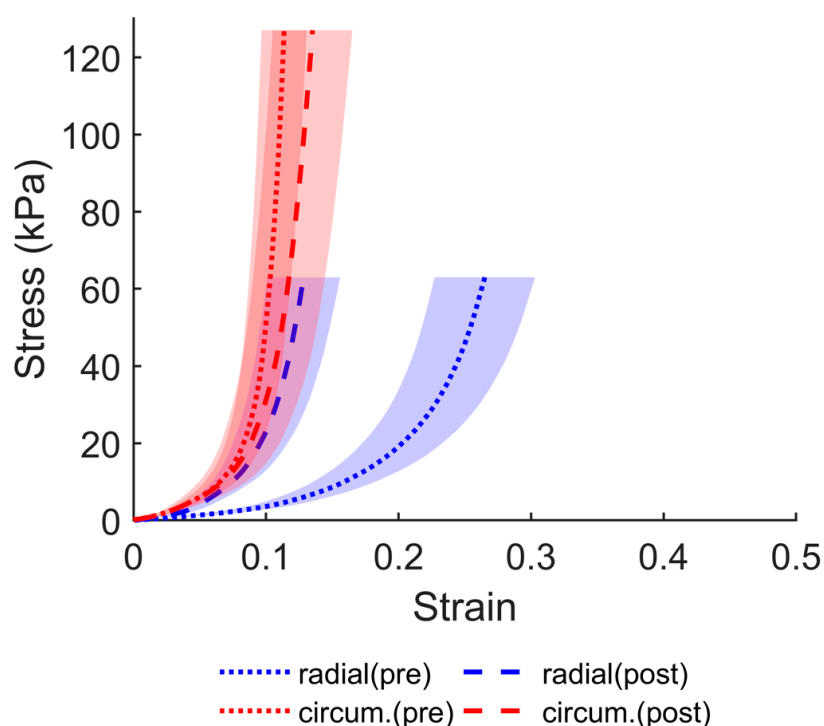

**Figure S3.** Average response of the anterior leaflet in the experiments with the maximum stress value of 63.5 kPa and 127 kPa in the radial and circumferential (circum.) directions, respectively (i.e., Protocol 4 in Table 1) for the DI water group. Shaded regions represent standard error.

Figure S4: Protocol 5 for DI water group

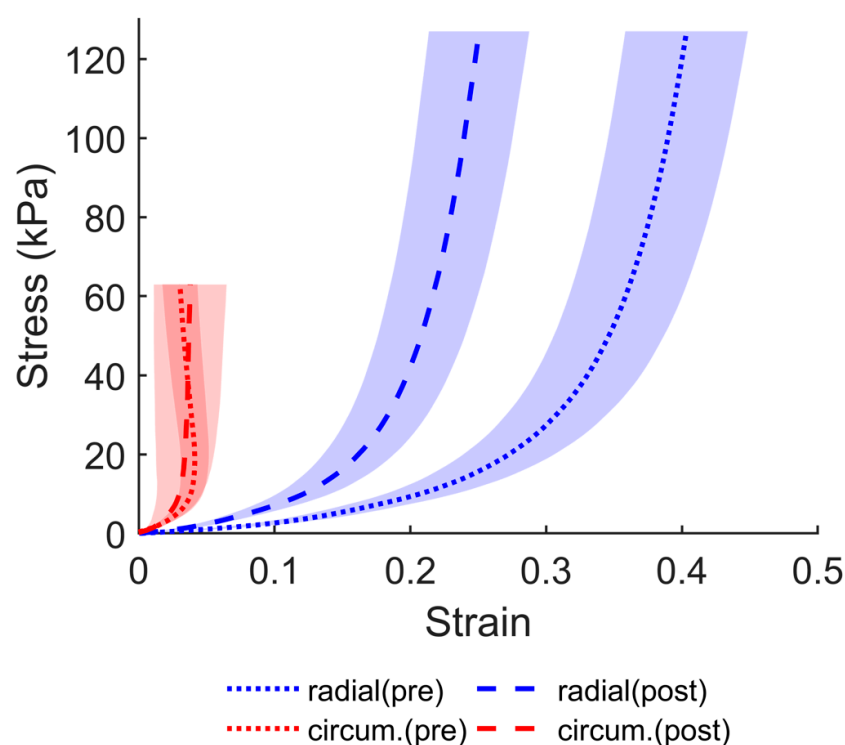

**Figure S4.** Average response of the anterior leaflet in the experiments with the maximum stress value of 127 kPa and 63.5 kPa in the radial and circumferential (circum.) directions, respectively (i.e., Protocol 5 in Table 1) for the DI water group. Shaded regions represent standard error.

Figure S5: Protocol 2 for control group

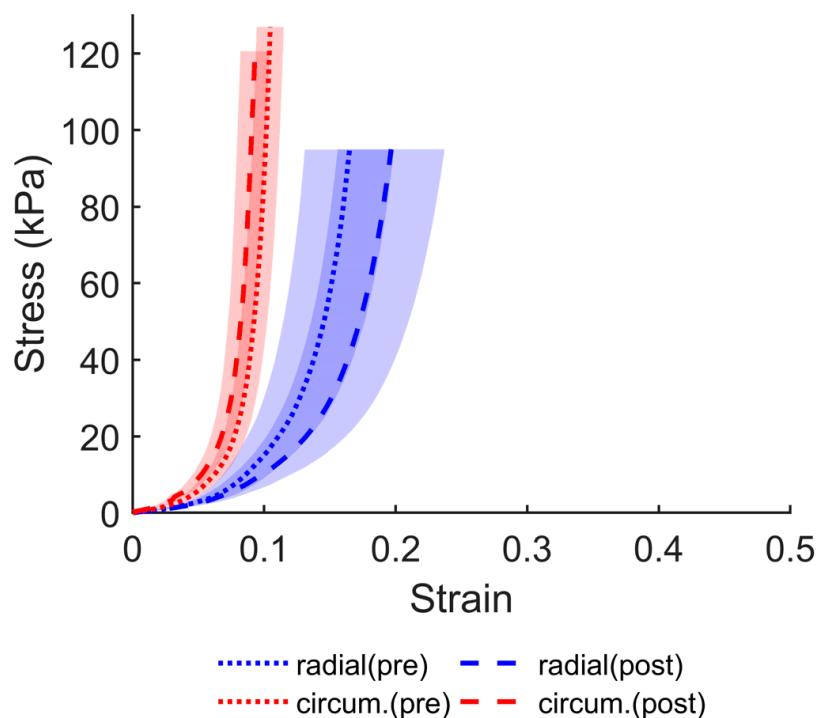

**Figure S5.** Average response of the anterior leaflet in the experiments with the maximum stress value of 95.25 kPa and 127 kPa in the radial and circumferential (circum.) directions, respectively (i.e., Protocol 2 in Table 1) for the control group. Shaded regions represent standard error.

Figure S6: Protocol 3 for control group

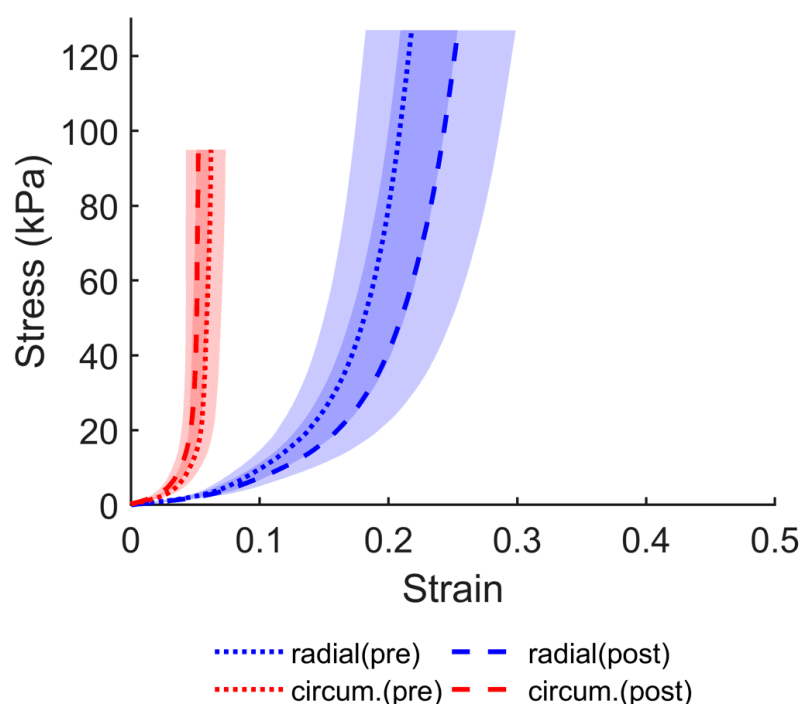

**Figure S6.** Average response of the anterior leaflet in the experiments with the maximum stress value of 127 kPa and 95.25 kPa in the radial and circumferential (circum.) directions, respectively (i.e., Protocol 3 in Table 1) for the control group. Shaded regions represent standard error.

Figure S7: Protocol 4 for control group

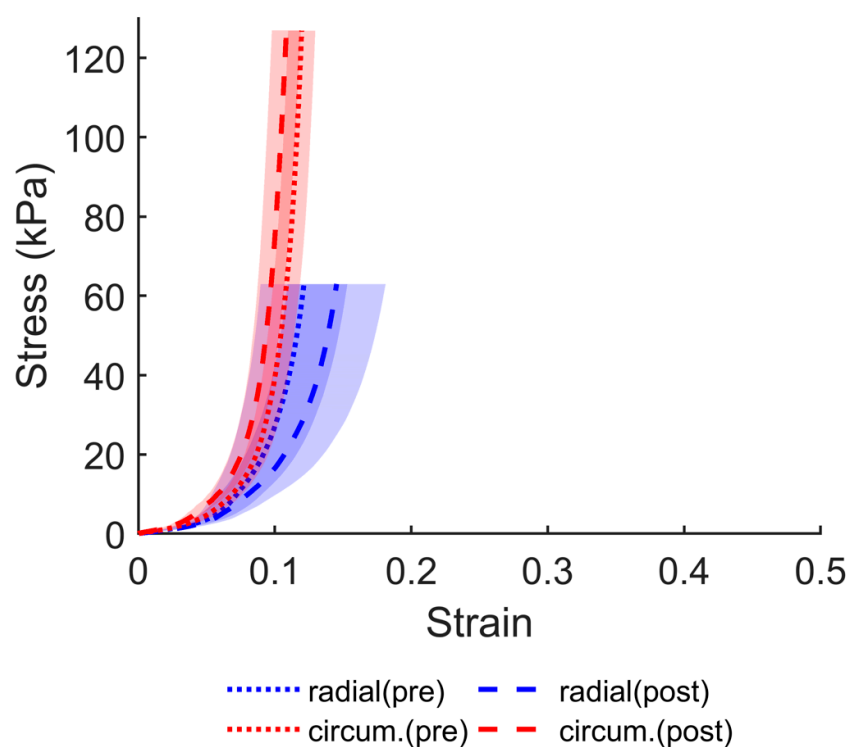

**Figure S7.** Average response of the anterior leaflet in the experiments with the maximum stress value of 63.5 kPa and 127 kPa in the radial and circumferential (circum.) directions, respectively (i.e., Protocol 4 in Table 1) for the control group. Shaded regions represent standard error.

Figure S8: Protocol 5 for control group

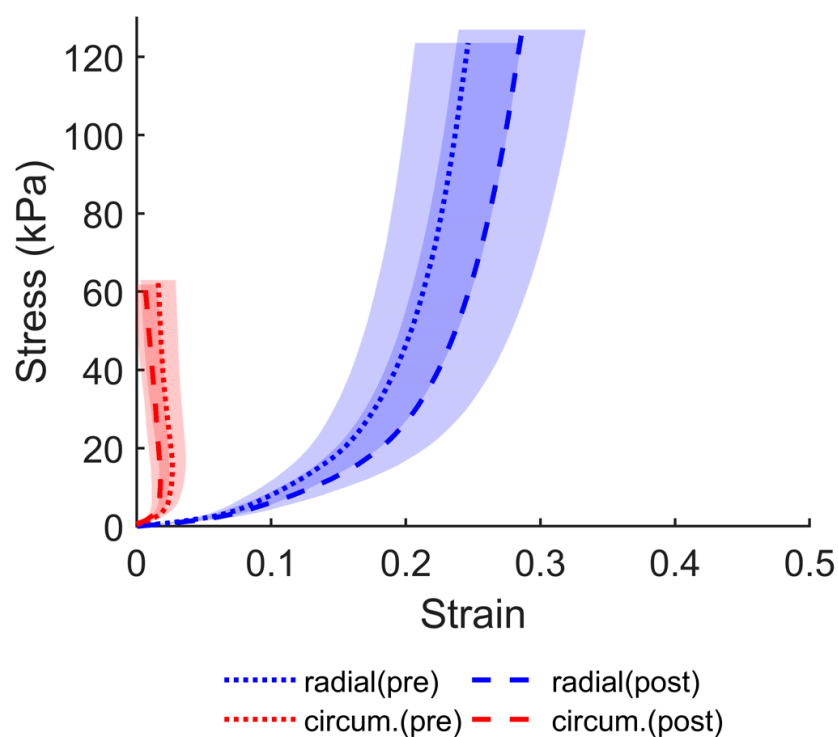

**Figure S8.** Average response of the anterior leaflet in the experiments with the maximum stress value of 127 kPa and 63.5 kPa in the radial and circumferential (circum.) directions, respectively (i.e., Protocol 5 in Table 1) for the control group. Shaded regions represent standard error.
